# Supplementary material for: In situ growth of Bi2MoO6on reduced graphene oxide nanosheets for improved visible-light photocatalytic activity
Source: Royal Society of Chemistry journal article supplement (doi:10.1039/c3ce41999a), 2013-11-05
Supplement: c3ce41999a.pdf [file c3ce41999a.pdf]

## Electronic Supplementary Information

### ***In situ* growth of Bi<sub>2</sub>MoO<sub>6</sub> on reduced graphene oxide nanosheets for improved visible-light photocatalytic activity**

Guohui Tian,<sup>a,b</sup> Yajie Chen,<sup>a</sup> Juan Zhou,<sup>a</sup> Chungui Tian,<sup>a</sup> Rong Li,<sup>a</sup> Chujun Wang<sup>a</sup> and Honggang Fu<sup>\*a</sup>

<sup>a</sup> Key Laboratory of Functional Inorganic Material Chemistry, Ministry of Education of the People's Republic of China, Heilongjiang University, Harbin 150080 P. R. China

<sup>b</sup> Key Laboratory of Chemical Engineering Process & Technology for High-efficiency Conversion, College of Heilongjiang Province, School of Chemistry and Materials Science, Heilongjiang University, Harbin 150080, China

Corresponding author\* fuhg@vip.sina.com, Tel.: +86 451 8660 4330, Fax: +86 451 8667 3647

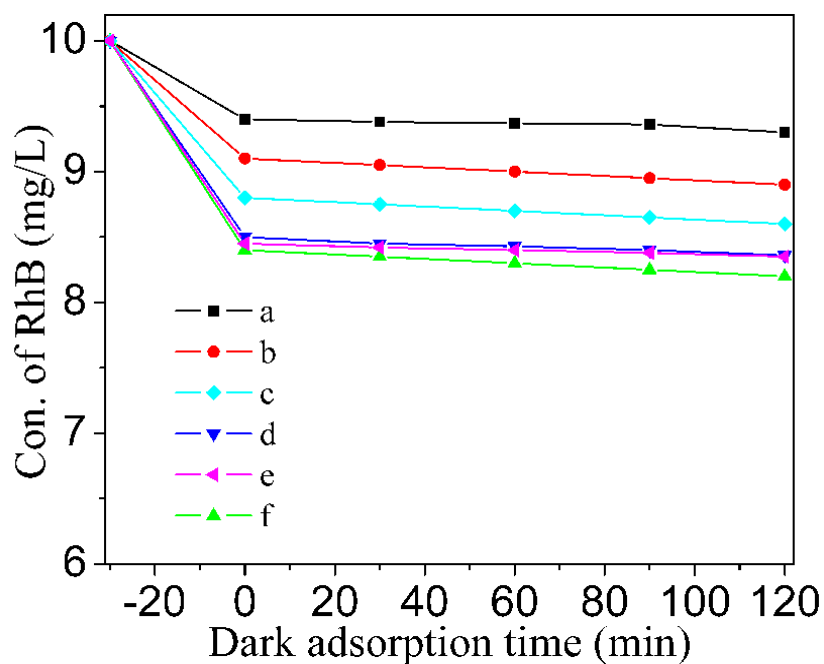

**Fig. S1** Dark adsorption curves of the different samples:  $\text{Bi}_2\text{MoO}_6$  (a), hierarchical RGO/ $\text{Bi}_2\text{MoO}_6$  composites with different GO contents: 2 wt% (b), 3 wt% (c), 4 wt% (d), the mixture of 4 wt% RGO and  $\text{Bi}_2\text{MoO}_6$  generated by mechanically mixing (e) and 5 wt% (f),
